# Supplementary material for: Clinical and genetic characteristics of hypophosphatasia in Chinese children
Source: Springer Nature journal article supplement (doi:10.1186/s13023-021-01798-1), 2021-04-07
Supplement: MOESM1 [file 19043790]

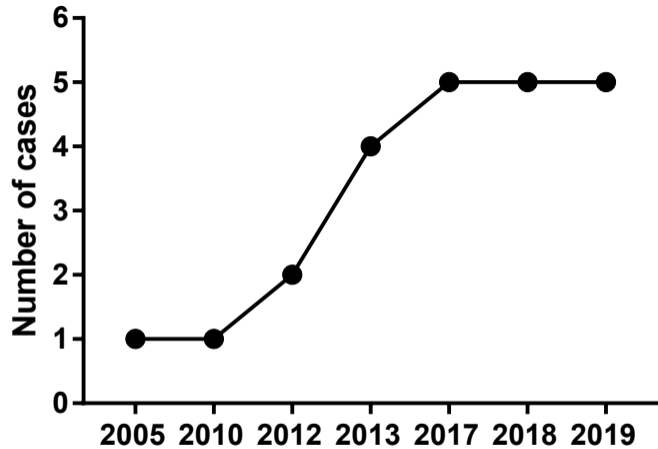

**Supplementary Figure 1. The number of HPP cases diagnosed in Chinese children from 2005 to 2019.**
